# Supplementary material for: The simultaneous detection of food dyes from different samples in a 96-well plate by spectrophotometry
Source: Royal Society of Chemistry journal article supplement (doi:10.1039/c9ay01810g), 2019-01-01
Supplement: c9ay01810g1.pdf [file c9ay01810g1.pdf]

## Supplementary material

### Simultaneous detection of food dyes from different samples in a 96-well plate by spectrophotometry

Rui Zhang <sup>a</sup>, Mengxin Zhang <sup>a</sup>, Yi Zhang <sup>a</sup>, Heng Yan <sup>b</sup>, Xing Li <sup>b</sup> and Wei-hong Xie <sup>\*a</sup>

<sup>a</sup> School of Biological Engineering and Food Science, Key Laboratory of Fermentation Engineering (Ministry of Education), Hubei Research Centre of Food Fermentation Engineering and Technology, Hubei University of Technology, 430068, Wuhan, China.

<sup>b</sup> Hubei Provincial Institute for Food Supervision and Test, Hubei Provincial Engineering and Technology Research Centre for Food Quality and Safety Test, Wuhan 430075, China.

\*Correspondence: xiewh@hbut.edu.cn; Tel.: +86-139-7113-5198

**Table S1**  $\epsilon$  data of six synthetic dyes obtained at the group I wavelengths

| dye | $\epsilon_{425}$ | $\epsilon_{480}$ | $\epsilon_{496}$ | $\epsilon_{508}$ | $\epsilon_{520}$ | $\epsilon_{626}$ |
|-----|------------------|------------------|------------------|------------------|------------------|------------------|
| TA  | 0.0361           | 0.0116           | 0.0027           | 0.0006           | 0.0001           | 0                |
| SY  | 0.0149           | 0.0334           | 0.0312           | 0.0279           | 0.0176           | 0                |
| AR  | 0.0101           | 0.0274           | 0.0313           | 0.0293           | 0.0259           | 0                |
| PO  | 0.0061           | 0.0177           | 0.0212           | 0.0220           | 0.0207           | 0                |
| AM  | 0.0054           | 0.0153           | 0.0199           | 0.0224           | 0.0236           | 0.0001           |
| BB  | 0.0027           | 0.0003           | 0.0007           | 0.0011           | 0.0019           | 0.0640           |

**Table S2**  $\epsilon$  data of six synthetic dyes obtained at the group II wavelengths

| dye | $\epsilon_{425}$ | $\epsilon_{478}$ | $\epsilon_{525}$ | $\epsilon_{331}$ | $\epsilon_{555}$ | $\epsilon_{626}$ |
|-----|------------------|------------------|------------------|------------------|------------------|------------------|
| TA  | 0.0361           | 0.0133           | 0.0001           | 0.0044           | 0                | 0                |
| SY  | 0.0149           | 0.0332           | 0.012            | 0.0072           | 0.0005           | 0                |
| AR  | 0.0101           | 0.0263           | 0.0246           | 0.0078           | 0.0114           | 0                |
| PO  | 0.0061           | 0.0171           | 0.0195           | 0.0113           | 0.0085           | 0                |
| AM  | 0.0054           | 0.0146           | 0.0235           | 0.0096           | 0.0161           | 0.0001           |
| BB  | 0.0027           | 0.0003           | 0.0024           | 0.0021           | 0.0077           | 0.064            |

**Table S3**  $\epsilon$  data of six synthetic dyes obtained at the group III wavelengths

| dye | $\epsilon_{383}$ | $\epsilon_{466}$ | $\epsilon_{534}$ | $\epsilon_{331}$ | $\epsilon_{558}$ | $\epsilon_{638}$ |
|-----|------------------|------------------|------------------|------------------|------------------|------------------|
| TA  | 0.0246           | 0.0213           | 0                | 0.0044           | 0                | 0                |
| SY  | 0.0105           | 0.0297           | 0.005            | 0.0072           | 0.0003           | 0                |
| AR  | 0.0065           | 0.0206           | 0.022            | 0.0078           | 0.0096           | 0                |
| PO  | 0.0036           | 0.0134           | 0.017            | 0.0113           | 0.0072           | 0                |
| AM  | 0.0045           | 0.0110           | 0.022            | 0.0096           | 0.0149           | 0                |
| BB  | 0.0041           | 0.0002           | 0.003            | 0.0021           | 0.0088           | 0.0552           |

**Table S4** The contents of the mixture solutions, the unit of the concentrations in the table is  $\mu\text{g}\cdot\text{mL}^{-1}$ .

| No. | $C_{TA}$ | $C_{SY}$ | $C_{AR}$ | $C_{PO}$ | $C_{AM}$ | $C_{BB}$ |
|-----|----------|----------|----------|----------|----------|----------|
| 1   | 4        | 4        | 4        | 4        | 4        | 4        |
| 2   | 5        | 5        | 5        | 5        | 5        | 5        |
| 3   | 7        | 7        | 7        | 7        | 7        | 7        |
| 4   | 8        | 8        | 8        | 8        | 8        | 8        |
| 5   | 10       | 10       | 10       | 10       | 10       | 10       |
| 6   | 12       | 12       | 12       | 12       | 12       | 12       |
| 7   | 13       | 13       | 13       | 13       | 13       | 13       |
| 8   | 14       | 14       | 14       | 14       | 14       | 14       |
| 9   | 15       | 15       | 15       | 15       | 15       | 15       |
| 10  | 16       | 16       | 16       | 16       | 16       | 16       |
| 11  | 20       | 20       | 20       | 20       | 20       | 20       |
| 12  | 5        | 10       | 15       | 20       | 25       | 30       |
| 13  | 10       | 5        | 25       | 30       | 20       | 15       |
| 14  | 15       | 20       | 5        | 25       | 30       | 10       |
| 15  | 20       | 15       | 30       | 5        | 10       | 25       |
| 16  | 25       | 30       | 10       | 15       | 5        | 20       |
| 17  | 30       | 25       | 20       | 10       | 15       | 5        |

**Table S5** Dye concentrations ( $\mu\text{g}\cdot\text{mL}^{-1}$ ) in mixture samples No. 1–17 predicted by equation group (4)

| Sample | $C_{TA}$  | $C_{SY}$  | $C_{AR}$  | $C_{PO}$   | $C_{AM}$  | $C_{BB}$  |
|--------|-----------|-----------|-----------|------------|-----------|-----------|
| 1      | 4.42(4)   | 2.13(4)   | -0.62(4)  | 20.68(4)   | -2.86(4)  | 4.19(4)   |
| 2      | 5.45(5)   | 2.66(5)   | -0.9(5)   | 25.88(5)   | -3.75(5)  | 5.19(5)   |
| 3      | 7.52(7)   | 4.33(7)   | -0.05(7)  | 31.06(7)   | -2.71(7)  | 7.27(7)   |
| 4      | 8.61(8)   | 4.88(8)   | 0.4(8)    | 34.95(8)   | -3.11(8)  | 8.29(8)   |
| 5      | 10.7(10)  | 6.81(10)  | 1.81(10)  | 38.03(10)  | -1.01(10) | 10.39(10) |
| 6      | 12.85(12) | 8.15(12)  | 2.43(12)  | 45.57(12)  | -1.66(12) | 12.42(12) |
| 7      | 13.85(13) | 8.79(13)  | 3.35(13)  | 47.74(13)  | -1.51(13) | 13.4(13)  |
| 8      | 14.86(14) | 10.17(14) | 4.97(14)  | 45.22(14)  | 1.9(14)   | 14.48(14) |
| 9      | 15.9(15)  | 10.85(15) | 5.98(15)  | 47.51(15)  | 1.98(15)  | 15.49(15) |
| 10     | 16.81(16) | 12.45(16) | 6.45(16)  | 46.48(16)  | 4.79(16)  | 16.52(16) |
| 11     | 20.86(20) | 17.07(20) | 11.64(20) | 44.33(20)  | 12.49(20) | 20.57(20) |
| 12     | 5.04(5)   | 7.82(10)  | 8.09(15)  | 38.80(20)  | 19.00(25) | 30.13(30) |
| 13     | 10.41(10) | 0.56(5)   | 14.53(25) | 66.07(30)  | 5.26(20)  | 15.49(15) |
| 14     | 14.76(15) | 19.35(20) | 1.88(5)   | 35.41(25)  | 25.82(30) | 10.23(10) |
| 15     | 19.29(20) | 17.26(15) | 28.57(30) | -11.81(5)  | 29.32(10) | 25.48(25) |
| 16     | 24.29(25) | 33.45(30) | 10.55(10) | -4.68(15)  | 22.35(5)  | 20.48(20) |
| 17     | 29.34(30) | 29.97(25) | 21.38(20) | -22.06(10) | 42.31(15) | 5.26(5)   |

**Table S6** Dye concentrations ( $\mu\text{g}\cdot\text{mL}^{-1}$ ) in mixture samples No. 1–17 predicted by equations group (5).

| Sample | $C_{TA}$  | $C_{SY}$  | $C_{AR}$  | $C_{PO}$  | $C_{AM}$  | $C_{BB}$  |
|--------|-----------|-----------|-----------|-----------|-----------|-----------|
| 1      | 4.37(4)   | 0.25(4)   | 10.1(4)   | 6.35(4)   | -1.18(4)  | 4.19(4)   |
| 2      | 5.36(5)   | 0.74(5)   | 11.7(5)   | 7.71(5)   | -0.85(5)  | 5.19(5)   |
| 3      | 7.45(7)   | 1.47(7)   | 15.87(7)  | 10.26(7)  | -0.61(7)  | 7.27(7)   |
| 4      | 8.52(8)   | 1.86(8)   | 17.81(8)  | 11.86(8)  | -0.59(8)  | 8.28(8)   |
| 5      | 10.65(10) | 3(10)     | 21.24(10) | 14.32(10) | 0.29(10)  | 10.39(10) |
| 6      | 12.73(12) | 4.43(12)  | 24.01(12) | 16.74(12) | 1.63(12)  | 12.41(12) |
| 7      | 13.72(13) | 5.07(13)  | 25.36(13) | 17.87(13) | 2.16(13)  | 13.4(13)  |
| 8      | 14.83(14) | 5.55(14)  | 27.5(14)  | 18.98(14) | 2.39(14)  | 14.48(14) |
| 9      | 15.83(15) | 6.61(15)  | 28.24(15) | 20.11(15) | 3.52(15)  | 15.49(15) |
| 10     | 16.81(16) | 7.46(16)  | 29.39(16) | 21.13(16) | 4.28(16)  | 16.52(16) |
| 11     | 20.98(20) | 11.27(20) | 33.64(20) | 25.14(20) | 8.21(20)  | 20.58(20) |
| 12     | 4.46(5)   | 12.72(10) | 9.93(15)  | 18.64(20) | 28.32(25) | 29.61(30) |
| 13     | 9.84(10)  | 2.87(5)   | 26.99(25) | 31.73(30) | 17.74(20) | 14.97(15) |
| 14     | 13.74(15) | 32.77(20) | -14.08(5) | 18.90(25) | 45.33(30) | 9.71(10)  |
| 15     | 19.74(20) | 12.56(15) | 32.68(30) | 6.28(5)   | 7.91(10)  | 24.95(25) |
| 16     | 24.12(25) | 37.93(30) | -1.50(10) | 11.19(15) | 14.23(5)  | 19.95(20) |
| 17     | 29.79(30) | 28.07(25) | 14.71(20) | 8.71(10)  | 19.24(15) | 4.74(5)   |

**Table S7** Dye concentrations ( $\mu\text{g}\cdot\text{mL}^{-1}$ ) in mixture samples No. 1–17 predicted by equations group (6).

| Sample | $C_{TA}$  | $C_{SY}$  | $C_{AR}$  | $C_{PO}$  | $C_{AM}$  | $C_{BB}$  |
|--------|-----------|-----------|-----------|-----------|-----------|-----------|
| 1      | 4.45(4)   | 1.79(4)   | 7.73(4)   | 4.81(4)   | 1.37(4)   | 4.17(4)   |
| 2      | 5.46(5)   | 2.37(5)   | 9.12(5)   | 6.1(5)    | 1.88(5)   | 5.15(5)   |
| 3      | 7.56(7)   | 3.64(7)   | 12.45(7)  | 8.08(7)   | 3.07(7)   | 7.21(7)   |
| 4      | 8.64(8)   | 4.31(8)   | 13.89(8)  | 9.33(8)   | 3.68(8)   | 8.21(8)   |
| 5      | 10.7(10)  | 5.83(10)  | 16.73(10) | 11.55(10) | 5.07(10)  | 10.33(10) |
| 6      | 12.81(12) | 7.35(12)  | 19.36(12) | 13.9(12)  | 6.55(12)  | 12.31(12) |
| 7      | 13.77(13) | 8.04(13)  | 20.63(13) | 15(13)    | 7.15(13)  | 13.3(13)  |
| 8      | 14.81(14) | 9.05(14)  | 22(14)    | 15.6(14)  | 8.25(14)  | 14.37(14) |
| 9      | 15.79(15) | 9.99(15)  | 22.88(15) | 16.9(15)  | 9.15(15)  | 15.37(15) |
| 10     | 16.69(16) | 10.96(16) | 23.94(16) | 17.79(16) | 10.1(16)  | 16.39(16) |
| 11     | 20.79(20) | 14.65(20) | 28.18(20) | 22.03(20) | 13.9(20)  | 20.44(20) |
| 12     | 4.34(5)   | 11.46(10) | 11.95(15) | 19.48(20) | 26.50(25) | 29.65(30) |
| 13     | 9.96(10)  | 3.86(5)   | 25.81(25) | 30.99(30) | 18.90(20) | 15.03(15) |
| 14     | 12.91(15) | 27.02(20) | -5.72(5)  | 22.96(25) | 37.59(30) | 9.77(10)  |
| 15     | 19.68(20) | 13.97(15) | 31.01(30) | 5.38(5)   | 9.45(10)  | 24.99(25) |
| 16     | 23.61(25) | 34.62(30) | 3.22(10)  | 13.51(15) | 9.87(5)   | 20.02(20) |
| 17     | 29.31(30) | 27.07(25) | 16.34(20) | 9.45(10)  | 17.81(15) | 4.80(5)   |

Note: The data in brackets are the spiked concentrations of the dyes in the mixtures. The highlight indicated that the predicted result is within 80%-120% of the spiked value.

**Table S8-1**  $\epsilon$  data of TA, SY and PO corresponding to the selected wavelengths for equation (7) and (8)

| dye | $\epsilon$ matrix for equation (7) |                  |                  | $\epsilon$ matrix for equation (8) |                  |                  |
|-----|------------------------------------|------------------|------------------|------------------------------------|------------------|------------------|
|     | $\epsilon_{425}$                   | $\epsilon_{480}$ | $\epsilon_{508}$ | $\epsilon_{401}$                   | $\epsilon_{476}$ | $\epsilon_{551}$ |
| TA  | 0.0233                             | 0.0072           | 0.0004           | 0.0202                             | 0.0092           | 0                |
| SY  | 0.0125                             | 0.0285           | 0.0237           | 0.011                              | 0.0282           | 0.001            |
| PO  | 0.0054                             | 0.0157           | 0.0195           | 0.004                              | 0.0146           | 0.009            |

**Table S8-2**  $\epsilon$  data of TA, AM and BB corresponding to the selected wavelengths for equation (9) and (10)

| dye | $\epsilon$ matrix for equation (9) |                  |                  | $\epsilon$ matrix for equation (10) |                  |                  |
|-----|------------------------------------|------------------|------------------|-------------------------------------|------------------|------------------|
|     | $\epsilon_{425}$                   | $\epsilon_{520}$ | $\epsilon_{626}$ | $\epsilon_{390}$                    | $\epsilon_{520}$ | $\epsilon_{626}$ |
| TA  | 0.0269                             | 0                | 0                | 0.0203                              | 0                | 0                |
| AM  | 0.0048                             | 0.0212           | 0                | 0.004                               | 0.0212           | 0                |
| BB  | 0.0025                             | 0.0018           | 0.0614           | 0.0047                              | 0.0018           | 0.0614           |

**Table S8-3**  $\epsilon$  data of TA, AR and BB corresponding to the selected wavelengths for equation (11) and (12)

| dye | $\epsilon$ matrix for equation (11) |                  |                  | $\epsilon$ matrix for equation (12) |                  |                  |
|-----|-------------------------------------|------------------|------------------|-------------------------------------|------------------|------------------|
|     | $\epsilon_{425}$                    | $\epsilon_{496}$ | $\epsilon_{626}$ | $\epsilon_{390}$                    | $\epsilon_{501}$ | $\epsilon_{626}$ |
| TA  | 0.0269                              | 0.0019           | 0                | 0.0203                              | 0.001            | 0                |
| AR  | 0.0089                              | 0.0277           | 0                | 0.0065                              | 0.0272           | 0                |
| BB  | 0.0025                              | 0.0006           | 0.0614           | 0.0047                              | 0.0018           | 0.0614           |

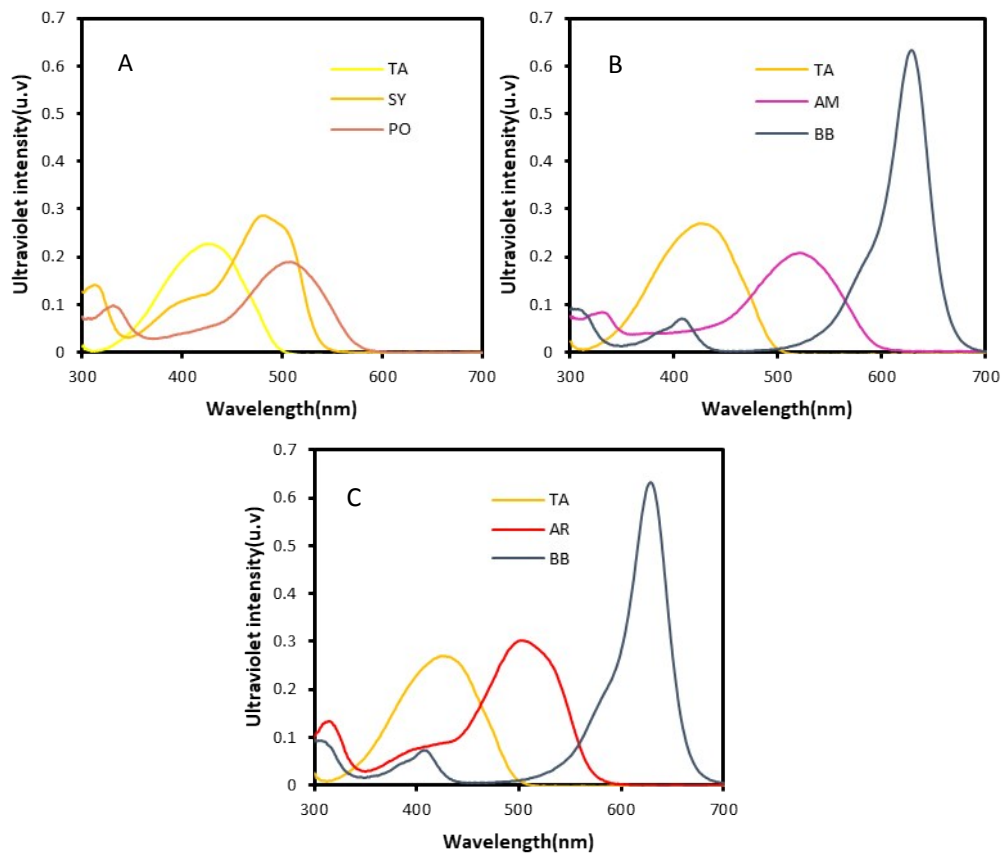

**Figure S1.** Spectra of food dyes tartrazine (TA), sunset yellow (SY), allura red (AR), ponceau 4R (PO), amaranth (AM), and bright blue (BB) classed in three groups: A) yellow orange, B) red purple and C) blue green.

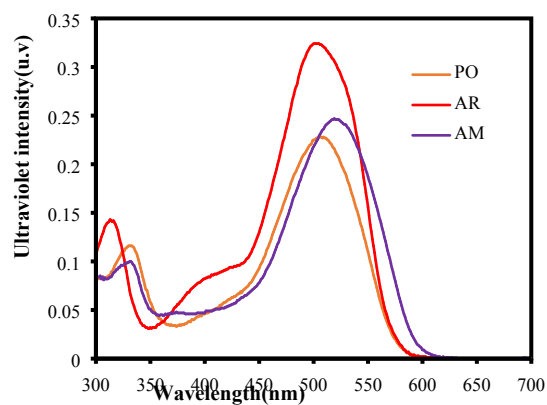

**Figure S2.** Spectra of three highly overlapped red dyes, ponceau 4R (PO), allura red (AR) and amaranth (AM)
